# Supplementary material for: Nonsequential Splicing Events Alter Antisense-Mediated Exon Skipping Outcome in COL7A1
Source: Int J Mol Sci. 2020 Oct 18;21(20):7705. doi: 10.3390/ijms21207705 (PMC7590164; doi:10.3390/ijms21207705)
Supplement: Supplementary file 1 [file ijms-21-07705-s001.pdf]

## Supplementary Material

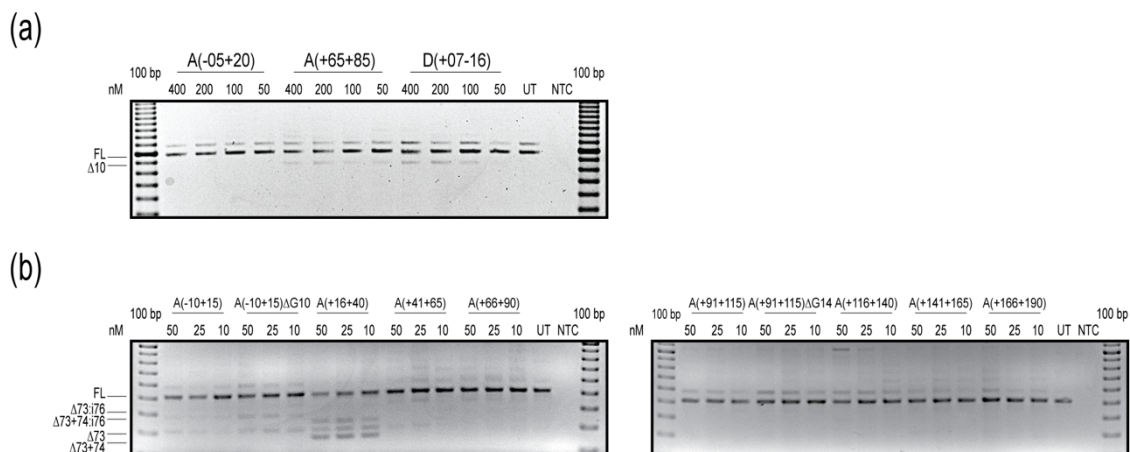

**Figure 1.** Evaluation of antisense oligomers (AOs) targeting *COL7A1* exons 10 and 73 after transfection into healthy human fibroblasts. **(a)** Reverse transcription-PCR analysis of *COL7A1* transcript after transfection with 2'-OMe AOs targeting *COL7A1* exon 10, transfected at concentrations indicated above the gel image. **(b)** Reverse transcription-PCR analysis of *COL7A1* transcript after transfection with 2'-OMe AOs targeting *COL7A1* exon 73, with transfection concentrations indicated above the gel image. NTC, no template control; UT, untreated; bp, base pairs; FL, full-length amplicon; nM, nanomolar.

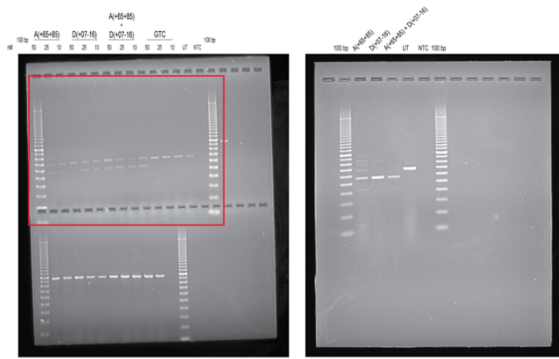

Figure 1 (b)

Figure 1 (c)

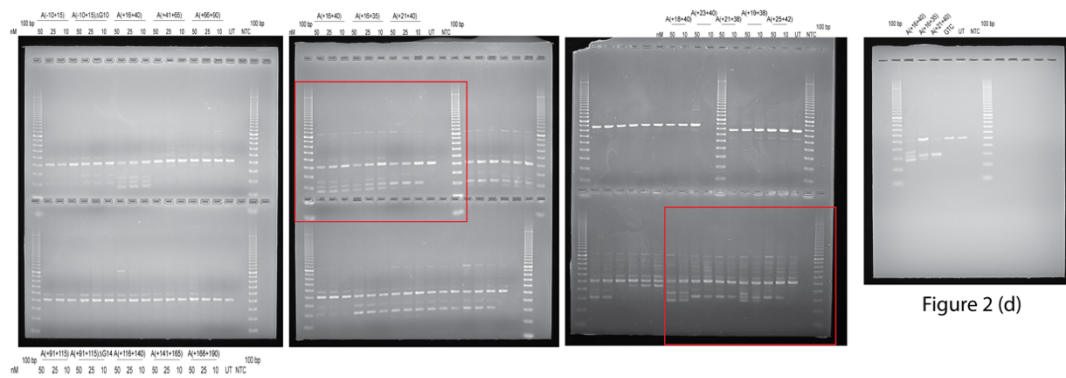

Figure 2 (b)  
Figure S1 (b)

Figure 2 (c)

Figure 2 (c)

Figure 2 (d)

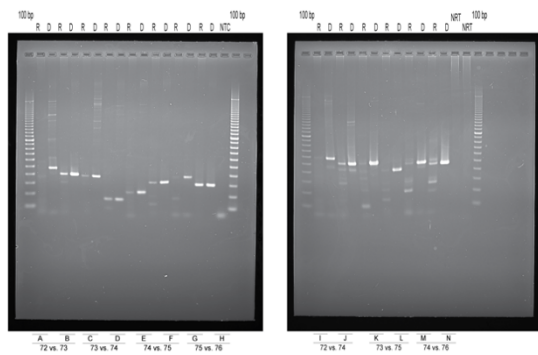

Figure 3 (b)

Figure 3 (b)

Figure 2. Full gels for figures listed.
